# Supplementary material for: Attenuation of SCI-Induced Hypersensitivity by Intensive Locomotor Training and Recombinant GABAergic Cells
Source: MDPI journal article supplement (doi:10.3390/bioengineering10010084), 2023-01-09
Supplement: s1 [file s1]

Supplementary Materials

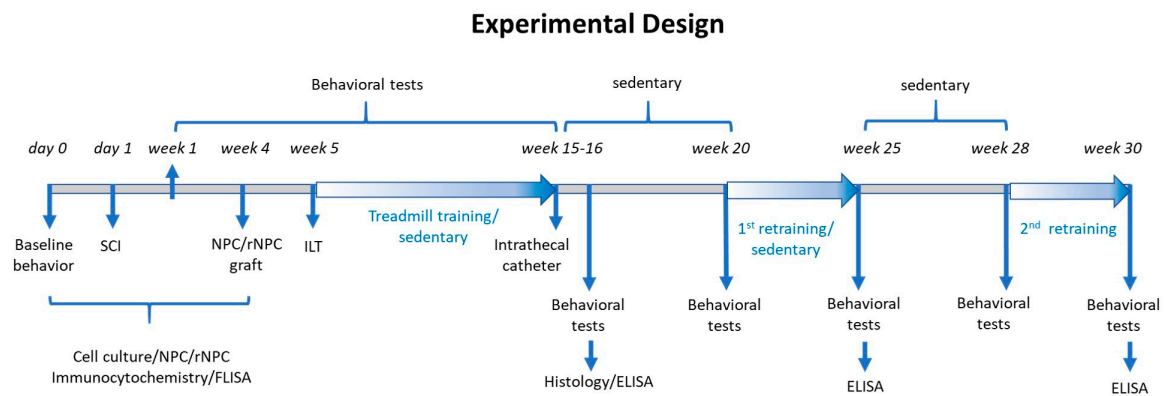

**Figure S1.** Experimental design and timeline of the study.

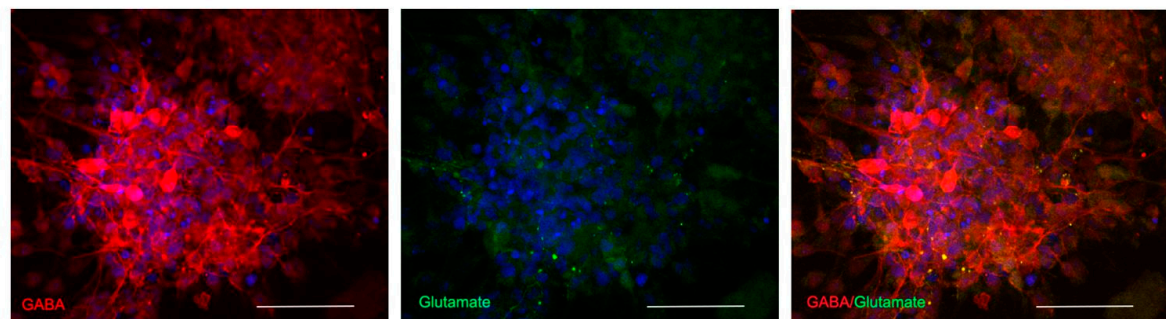

**Figure S2.** Immunocytochemical analysis of NPCs culture for the presence of GABA (red) and glutamate (green) markers. DAPI used for nuclear staining.

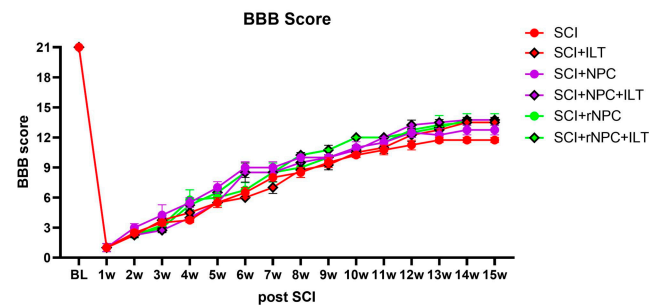

**Figure S3.** Locomotor scores of animals after SCI with different treatments. N = 10 (SCI, NPC, rNPC), 16(ILT, ILT+NPC, ILT+rNPC).

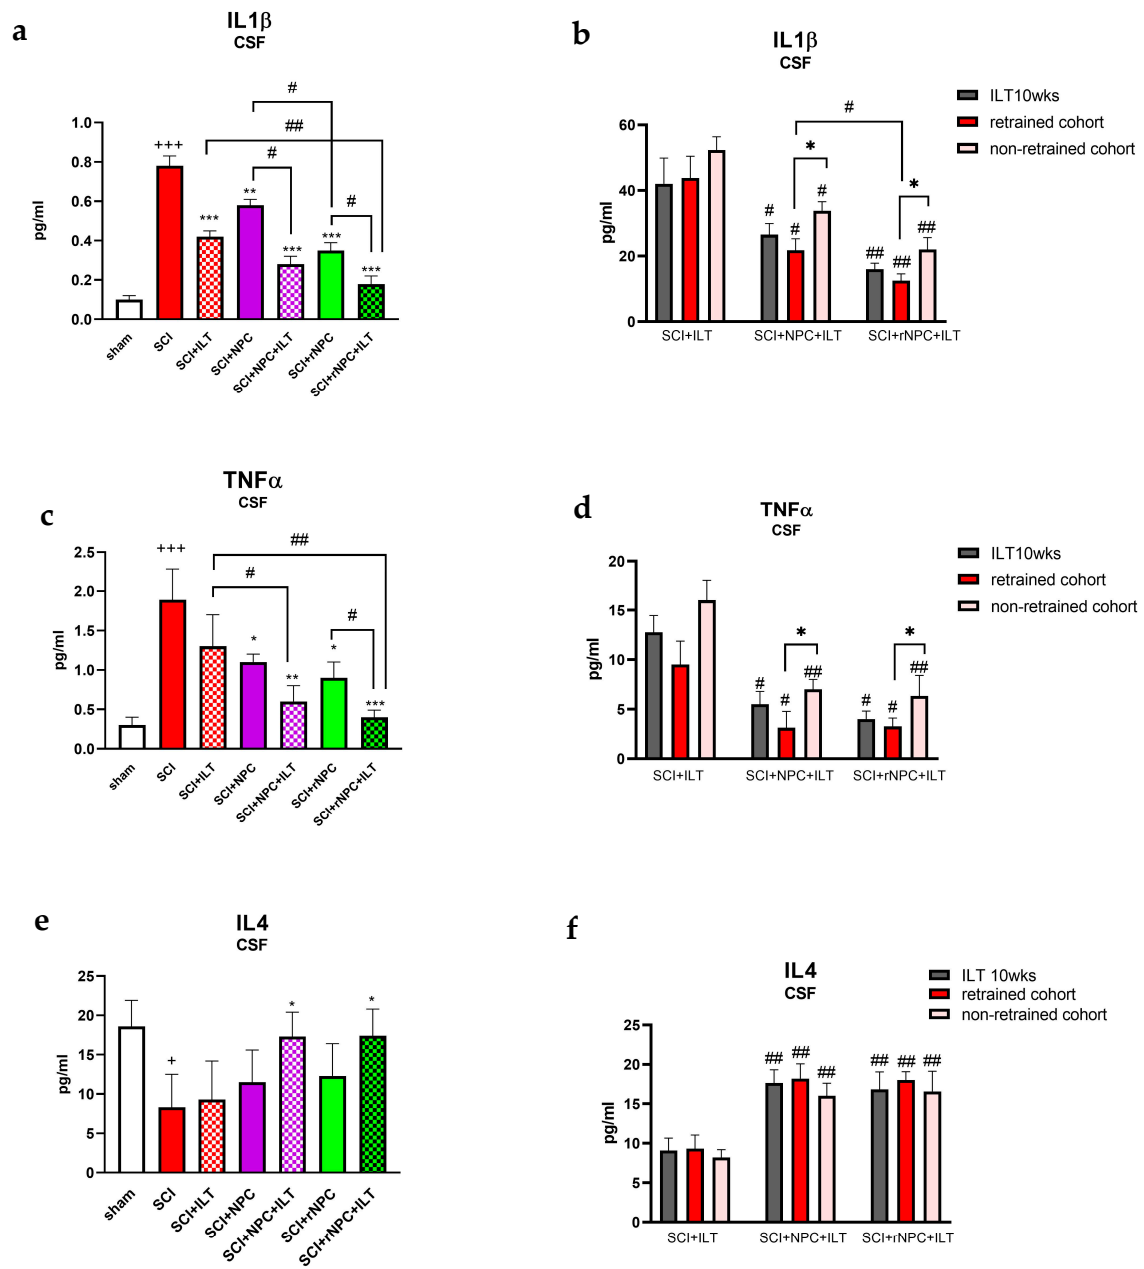

**Figure S4.** ELISA analysis of IL1 $\beta$  (a, b) TNF $\alpha$  (c, d), and IL4 (e, f) in the CSF of animals with different treatments after 10 weeks of ILT/15 weeks post-SCI (left column) and in retrained and non-retrained cohorts (right column). (a, c, e)  $+p < 0.05$ ,  $+++p < 0.001$  vs. sham,  $*p < 0.05$ ,  $**p < 0.01$ ,  $***p < 0.001$  vs. SCI,  $\#p < 0.05$ ,  $##p < 0.01$ , between indicated groups. (b, d, f)  $*p < 0.05$  during training/retraining/sedentary periods within each treatment group.  $\#p < 0.05$  for SCI+NPC+ILT and SCI+rNPC+ILT vs. respective training periods in SCI+ILT group and between indicated groups.  $n = 3-4$ /group.
